# Supplementary material
Source: PubMed Central journal article supplement (PMC6038065)

# Glypican-3 nanovaccine prevents liver cancer development

## Supplementary materials and methods

### *Reagents and cell lines*

1,2-Dioleoyl-3-trimethylammonium-propane (DOTAP) and 1,2-distearoyl-sn-glycero-3-phosphoethanolamine-N-[amino (polyethylene glycol)-2000] (DSPE-PEG-NH<sub>2</sub>) were purchased from Avanti Polar Lipids (Alabaster, USA).

Hepa1-6 cells were purchased from ATCC and cultured in RPMI medium. HepG2 cells were cultured in DMEM medium. LO2 cells were kindly provided by Professor Gangqiao Zhou at National Center for Protein Sciences, Beijing, China.

### *Analysis of molecular expression in migratory DCs*

Bone marrow cells were collected from C57BL/6 mouse femur and tibia and cultured in RPMI 1640 medium containing 5% fetal calf serum, 50 mM 2-ME and 20 ng/ml recombinant mouse GM-CSF (Peprotech, USA) at 37°C for 6 days to generate BMDCs using standard laboratory protocols [1]. In total 3×10<sup>6</sup>/ml BMDCs were stimulated with 5 µg/ml GPC3, or 5 µg/ml GPC3 plus 0.5 µg/ml CL097 (Invivogen, CA). After stimulation for 24 h, we collected the cells, prepared RNA using TRIzol (Invitrogen) and synthesized cDNA using PrimeScript RT Reagents (Takara, Dalian, China) following the manufacturer's protocols. Quantitative Real-Time PCR (qRT-PCR) was performed using SYBR Premix Ex Taq on an Applied Bio-systems 7500 Real-Time PCR system (Life Technologies) with the primers provided in [Supplementary Table 1](#). The relative mRNA levels were determined with GAPDH as control and represented as 2<sup>-ΔΔCT</sup> based on report [2].

### *Characterization of GPC3 nanovaccine containing CL097 using mannosylated liposome*

LPMAN encapsulation efficiencies of GPC3 and CL097 were determined by measuring the percentage of liposome-bound components after removing free GPC3 and CL097 by dialysis (molecular weight cut-off: 100 kD). Liposome-bound components were then treated with 10% Triton X-100, followed by measurement of the protein levels using the Pierce BCA Protein Assay Kit (Thermo Scientific, MA) and CL097 level using UPLC-Q/TOF as we described previously [3, 4]. For optimal encapsulation efficiency, the mannose residues exposure on LPMAN, LPMAN-GPC3 and LPMAN-GPC3/CL097 was determined by concanavalin A agglutination assay [3].

In total 100 µl of concanavalin A at the concentration of 0.1 mg/ml was mixed with 10 µl 0.1 mmol/ml different liposomes, and the absorbance at 390 nm was measured at different time points by Synergy H1 Hybrid Multi-Mode Reader. To determine the agglutination caused by mannose residues exposure on liposomes, concanavalin A pre-blocked with mannose was mixed with LPMAN, and the absorbance at 390nm was measured. DOTAP (LP) was also measured.

### *Detection of anti-GPC3 antibodies*

To determine anti-GPC3 antibodies, all serum samples were stored at -20°C and detected at the same time using a method established in our laboratory. Briefly, purified recombinant GPC3 protein was dissolved in carbonate bicarbonate buffer (pH 9.6) at 1 µg/ml and added to high-bound ELISA microtiter plates (100 µl/well). After being incubated at 4°C overnight, the plates were blocked with PBS containing 3% BSA for 2 h at room temperature. Diluted mouse serum (100 µl/well) was added, and normal mouse serum was used as the negative control, while mouse anti-GPC3 (BioMosaics, Burlington, VT) was used as the positive control. After incubation overnight at 4°C, the plates were washed and incubated with 1:10,000 diluted HRP-conjugated goat anti-mouse IgG (zsbio, Beijing, China) for 1 h at room temperature. The plates were colorized by adding tetramethylbenzidine for 30 min. The optical densities (OD) were measured at 450 nm using a spectrophotometer (Rayto, China). Cutoff value was set as the average OD<sub>450 nm</sub> calculated from 6 wells of normal serum plus a 3-fold standard deviation.

# Glypican-3 nanovaccine prevents liver cancer development

## *Generation of GPC3-expressing murine hepatoma cell line*

A GPC3-expressing plasmid was constructed by sub-cloning the human GPC3 DNA fragment (73 to 600) in frame into the p3xFLAG-cmv-14 vector (Sigma) to generate Pcmv-GPC3 ([Supplementary Figure 2](#)). The Pcmv-GPC3 plasmid contains the amino acids of GPC3 from 25 to 200 in the N-terminus. A murine hepatoma cell line, Hepa1-6, with the C57BL background was transfected with Pcmv-GPC3. Stable transfected cells (Hepa/GPC3) were selected in the presence of 1 mg/ml of G418 for 4 weeks. To confirm GPC3 expression, cell lysates were prepared from Hepa1-6 and Hepa/GPC3 cells. Immunoblotting with the anti-human GPC3 antibody (Biomacaics, VT) and anti-human  $\beta$ -actin antibody (Sigma) was used. HRP-conjugated secondary antibody was incubated with the membranes, and the target protein bands were detected using ECL Western Blotting Substrate (Thermo Fisher Scientific, USA).

## *Quantification of cytokines in liver tissues and in cell culture supernatant*

To quantify Granzyme B and IFN $\gamma$  in liver tissues, interstitial liquid was prepared as reported previously [5]. Each 100 mg tissue sample was cut into small pieces in 400  $\mu$ l of ice cold normal saline and incubated on ice for 15 min. The Granzyme B and IFN $\gamma$  concentrations in the liver interstitial fluid and cell culture supernatant were measured using commercialized ELISA kits (eBioscience) according to the manufacturer's instructions.

## *Immunofluorescent staining*

BMDCs were then stimulated with LPMan-BSA/CL097 containing 5  $\mu$ g/ml AF-BSA plus 0.5  $\mu$ g/ml CL097, or the same amount of LPMan-BSA, or free AF-BSA for 3 h at 37°C in an atmosphere of 5% CO $_2$ . After extensive washing twice with PBS, the cells were placed on poly-L-lysine-coated slides using Cytospin (WESCO), and fixed with 2% (wt/vol) paraformaldehyde for 10 min at room temperature. Cells were permeabilized in PBS containing 0.1% (wt/vol) saponin for 10 min at room temperature, washed, and incubated with goat anti-EEA1 (N-19), or anti-Erp78 (N-20), or anti-Giantin (N-18, Santa Cruz, CA) or anti-LAMP1 (Sigma-Aldrich, MO) overnight at 4°C and then stained with Cy3-labeled donkey anti-goat IgG antibodies for 1 h at room temperature. After extensive washing, the glass slides were mounted with Vectashield. Image acquisitions and analysis were performed using a Leica microscope and software (Wentzler, Germany).

## *Flow cytometry (FCM) analysis*

The following antibodies were all purchased from eBioscience: anti-mouse CD45 (30-F11), CD3 (145-2C11), CD4 (GK1.5), CD8 $\alpha$  (53-6.7), IFN- $\gamma$  (XMG1.2), CD103 (2E7), CD11c (N418), and CCR7 (4B12). Anti-mouse H-2K $^b$ /H-2D $^b$  (28-8-6), MHCII (m5/114.15.2), and CD83 (MICHEL-19) were purchased from Biolegend (San Diego, CA). Flow cytometry was performed using standard laboratory protocols. Briefly, fluorescence conjugated antibody was added directly to the cell suspension for 30 min in the dark at 4°C for cell surface antigens staining. To detect the presence of GPC3-specific T cell, splenocytes were collected and ex vivo stimulated immediately with the human GPC3 proteins (10  $\mu$ g/ml) for 90 h. Cells were collected, stained with surface markers and then fixed with 100  $\mu$ l of intracellular Fixation Buffer (eBioscience) for 30 min on dark at 4°C. After twice washing with 1 $\times$  Permeabilization Buffer (eBioscience), cells were re-suspended with PE/Cy7-conjugated anti-mouse IFN- $\gamma$  antibody diluted in 100  $\mu$ l of 1 $\times$  Permeabilization Buffer (eBioscience) and incubated in the dark at room temperature for 45 min. After twice washing, cells were re-suspended in PBS containing 0.1% BSA and 1 mM EDTA. Data were acquired in an LSR-II system (Becton Dickinson, San Diego, CA) and analyzed using Flowjo software (Tree Star Inc, Asland, OR).

## *Antigen-specific cytotoxicity assay*

Liver tissues were harvested and intrahepatic lymphocytes (IHL) were collected as previous reported [6]. Hepa1-6 tumor cells were labeled with 2  $\mu$ M CFSE at 37°C for 10 min. After washing twice with PBS, 2000 CFSE-labeled Hepa/GPC3 cells were co-cultured with 8,000 IHLs for 4 h. The killing of target Hepa/GPC3 cells was analyzed by flow cytometry. The specific killing activity was measured using the following formula: (1-ratio of CFSE in the absence of IHL/ratio of CFSE in the presence of IHL)  $\times$ 100.

## Glypican-3 nanovaccine prevents liver cancer development

### References

- [1] Inaba K, Inaba M, Romani N, Aya H, Deguchi M, Ikehara S, Muramatsu S and Steinman RM. Generation of large numbers of dendritic cells from mouse bone marrow cultures supplemented with granulocyte/macrophage colony-stimulating factor. *J Exp Med* 1992; 176: 1693-1702.
- [2] Livak KJ and Schmittgen TD. Analysis of relative gene expression data using real-time quantitative PCR and the 2(-Delta Delta C(T)) Method. *Methods* 2001; 25: 402-408.
- [3] Wang C, Liu P, Zhuang Y, Li P, Jiang B, Pan H, Liu L, Cai L and Ma Y. Lymphatic-targeted cationic liposomes: a robust vaccine adjuvant for promoting long-term immunological memory. *Vaccine* 2014; 32: 5475-5483.
- [4] Wang Y, Chen K, Wu Z, Liu Y, Liu S, Zou Z, Chen SH and Qu C. Immunizations with hepatitis B viral antigens and a TLR7/8 agonist adjuvant induce antigen-specific immune responses in HBV-transgenic mice. *Int J Infect Dis* 2014; 29: 31-36.
- [5] Baronio G, Schwartz L, Kiselevsky M, Guais A, Sanders E, Milanese G, Baronio M and Freitas I. Tumor interstitial fluid as modulator of cancer inflammation, thrombosis, immunity and angiogenesis. *Anticancer Res* 2012; 32: 405-414.
- [6] Wu J, Du J, Liu L, Li Q, Rong W, Wang L, Wang Y, Zang M, Wu Z, Zhang Y and Qu C. Elevated pretherapy serum IL17 in primary hepatocellular carcinoma patients correlate to increased risk of early recurrence after curative hepatectomy. *PLoS One* 2012; 7: e50035.

**Supplementary Table 1.** List of mouse quantitative RT-PCR primers

| Genes               | Accession Number | Sequence (5' to 3')     | Location  | F/R | Product Size |
|---------------------|------------------|-------------------------|-----------|-----|--------------|
| <i>Bip</i>          | NM_001163434     | GCATCACGCCGTCGTATGT     | 182-200   | F   | 134 bp       |
|                     |                  | ATTCCAAGTGCCTCCGATGAG   | 315-295   | R   |              |
| <i>Calreticulin</i> | NM_007591        | AAGATGCCCGATTTCACGCAC   | 209-229   | F   | 110 bp       |
|                     |                  | CCCACAGTCGATATTCTGCTC   | 318-298   | R   |              |
| <i>Cd74</i>         | NM_001042605     | AGATGCGGATGGCTACTCC     | 266-284   | F   | 96 bp        |
|                     |                  | TCATGTTGCCGACTTGGTAAC   | 361-340   | R   |              |
| <i>Edem1</i>        | NM_138677        | TCCAGAAGGCAGTCAAGTTAGT  | 590-611   | F   | 89 bp        |
|                     |                  | CAGAACCCTTATCGTAGCTTCG  | 678-657   | R   |              |
| <i>Edem2</i>        | NM_145537        | ACCACGCCTACGACAGTTAC    | 131-150   | F   | 113 bp       |
|                     |                  | GGCATCAATTAGCGTCAGAGAA  | 243-222   | R   |              |
| <i>Erap1</i>        | NM_030711        | TAATGGAGACTCATTCCCTTGGA | 93-115    | F   | 102 bp       |
|                     |                  | AAAGTCAGAGTGCTGAGGTTTG  | 194-173   | R   |              |
| <i>Erp57</i>        | NM_007952        | CATGCTAGTCGAGTTCTTCGC   | 141-161   | F   | 119 bp       |
|                     |                  | CAGTGCAATCCACCTTTGCTAA  | 259-238   | R   |              |
| <i>Gapdh</i>        | NM_008084        | AGGTCGGTGTGAACGGATTG    | 8-28      | F   | 123 bp       |
|                     |                  | TGTAGACCATGTAGTTGAGGTCA | 130-108   | R   |              |
| <i>Gilt</i>         | NM_023065        | CCTGGTCTCCGATCCTACCAT   | 5-25      | F   | 118 bp       |
|                     |                  | TTGCAGGTGGTTGTGCCTT     | 122-104   | R   |              |
| <i>Hsp90</i>        | NM_010480        | TGTTGCGGTAACACATCTGC    | 1388-1409 | F   | 116 bp       |
|                     |                  | GTCCTTGGTCTCACCTGTGATA  | 1503-1482 | R   |              |
| <i>Sec22b</i>       | NM_011342        | CTGACGATGATCGCCCGTG     | 10-28     | F   | 107 bp       |
|                     |                  | TGCTTAGCCTGACTCTGACTG   | 116-94    | R   |              |
| <i>Tap1</i>         | NM_013683        | GGACTTGCCTTGTCCGAGAG    | 253-273   | F   | 116 bp       |
|                     |                  | GCTGCCACATAACTGATAGCGA  | 368-347   | R   |              |
| <i>Tap2</i>         | NM_011530        | CTGGCGGACATGGCTTTACTT   | 40-60     | F   | 130 bp       |
|                     |                  | CTCCCACTTTTAGCAGTCCCC   | 169-149   | R   |              |
| <i>Tapbp</i>        | NM_001025313     | GGCCTGTCTAAGAAACCTGCC   | 118-138   | F   | 97 bp        |
|                     |                  | CCACCTGAAGTATAGCTTTGGG  | 214-192   | R   |              |

## Glypican-3 nanovaccine prevents liver cancer development

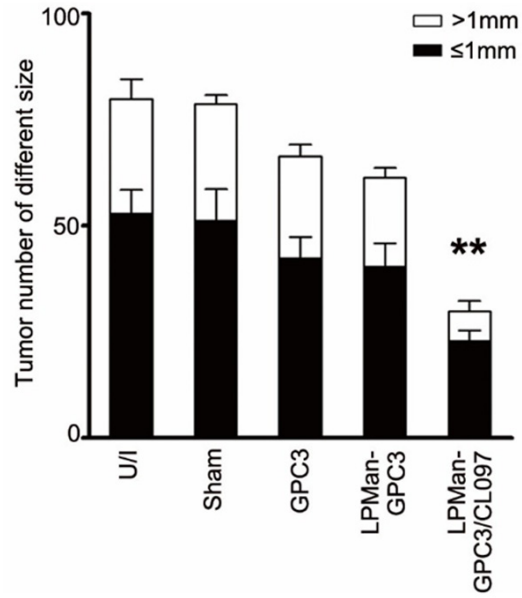

**Supplementary Figure 1.** Tumor numbers of different sizes determined at wk20 after DEN administration in differently treated mice. Male HBV-transgenic mice (HBV-Tg) received 25 mg/kg of DEN intraperitoneally at 2 weeks old (wk0). They then received different treatments starting from wk8 after DEN administration for 4 doses, as shown in **Figure 4A**. Un-paired *t*-test was conducted. **\*\*** $P < 0.01$  compared with sham-immunization. U/I: Mice did not receive any treatment after DEN administration. Sham: Mice were immunized with LPMan-CL097, each dose containing 5  $\mu$ g of CL097,  $n=5$ . GPC3: Mice were immunized with 5  $\mu$ g of purified GPC3,  $n=5$ . LPMan-GPC3: Mice were immunized with LPman-GPC3, each dose containing 5  $\mu$ g of GPC3. LPMan-GPC3/CL097: Mice were immunized with LPMan-GPC3/CL097, each dose containing 5  $\mu$ g of GPC3 plus 5  $\mu$ g of CL097.

## Glypican-3 nanovaccine prevents liver cancer development

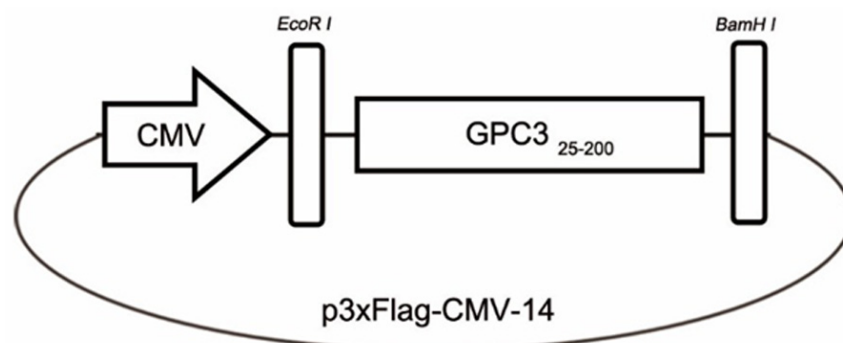

**Supplementary Figure 2.** Diagram of the GPC3-expressing plasmid pCMV-GPC3. The human GPC3 DNA fragment (73 to 600) was created by subcloning into the p3xFLAG-cmv-14 vector (Sigma), which contains the amino acids from 25 to 200 in the N-terminus.

**Supplementary Table 2.** Encapsulation efficiency and character with different concentrations of GPC3

| Component                              |                                 |                       | Particle character            |                        |                               |
|----------------------------------------|---------------------------------|-----------------------|-------------------------------|------------------------|-------------------------------|
| DOTAP<br>(molar ratio, 1 $\mu$ mol/ml) | DSPE-PEG-Man<br>( $\mu$ mol/ml) | GPC3<br>( $\mu$ g/ml) | Encapsulation<br>Efficacy (%) | Diameter<br>Z-Ave (nm) | Surface Charge<br>Zeta P (mV) |
| 95%                                    | 5%                              | 0                     | 0                             | 158.3 $\pm$ 9.8        | 48.6 $\pm$ 8.1                |
|                                        |                                 | 50                    | 62.54                         | 111.4 $\pm$ 3.0        | 38.8 $\pm$ 1.8                |
|                                        |                                 | 75                    | 41.72                         | 100.6 $\pm$ 2.9        | 37.2 $\pm$ 1.8                |
|                                        |                                 | 100                   | 96.02                         | 105.4 $\pm$ 7.4        | 42.2 $\pm$ 1.2                |
|                                        |                                 | 125                   | 80.76                         | 137.7 $\pm$ 2.1        | 49.9 $\pm$ 2.8                |
|                                        |                                 | 150                   | 65.9                          | 144.5 $\pm$ 2.9        | 48.6 $\pm$ 7.6                |
|                                        |                                 | 175                   | 73.16                         | 136 $\pm$ 12.3         | 46.6 $\pm$ 8.0                |
|                                        |                                 | 200                   | 76.92                         | 143.2 $\pm$ 3.5        | 52.6 $\pm$ 1.5                |

**Supplementary Table 3.** Encapsulation efficiency and character with different concentrations of CL097

| Component                            |                                 |                       |                     | Particle character            |                        |                        |
|--------------------------------------|---------------------------------|-----------------------|---------------------|-------------------------------|------------------------|------------------------|
| DOTAP<br>(molar ratio, $\mu$ mol/ml) | DSPE-PEG-Man<br>( $\mu$ mol/ml) | GPC3<br>( $\mu$ g/ml) | CL097<br>$\mu$ g/ml | Encapsulation<br>Efficacy (%) | Diameter<br>Z-Ave (nm) | Voltage<br>Zeta P (mV) |
| 95%                                  | 5%                              | 100                   | 0                   | 96.02                         | 105.4 $\pm$ 7.4        | 42.2 $\pm$ 1.2         |
|                                      |                                 |                       | 1                   | 95.96                         | 105.1 $\pm$ 3.8        | 42.0 $\pm$ 1.5         |
|                                      |                                 |                       | 10                  | 95.93                         | 104.8 $\pm$ 4.7        | 40.9 $\pm$ 1.1         |
|                                      |                                 |                       | 50                  | 95.89                         | 106.4 $\pm$ 3.0        | 38.8 $\pm$ 1.8         |
|                                      |                                 |                       | 100                 | 95.65                         | 101.4 $\pm$ 1.4        | 29.5 $\pm$ 1.0         |
|                                      |                                 |                       | 150                 | 80.76                         | 117.7 $\pm$ 2.1        | 19.9 $\pm$ 2.8         |
|                                      |                                 |                       | 200                 | 65.9                          | 114.5 $\pm$ 2.9        | 18.6 $\pm$ 7.6         |

# Glypican-3 nanovaccine prevents liver cancer development

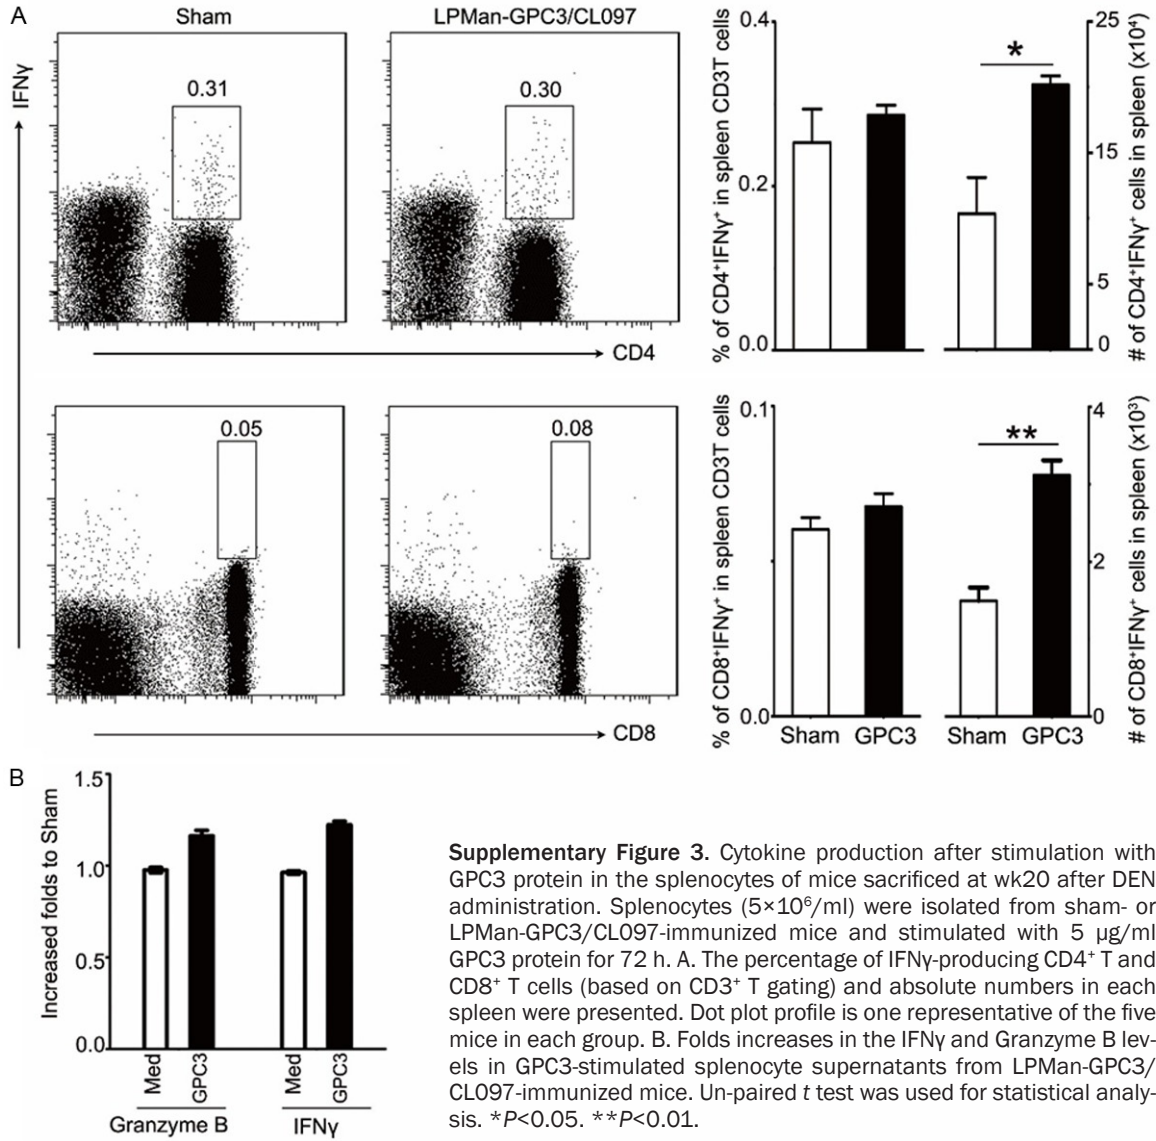

Supplement: ajtr0010-1736-f6.pdf [file ajtr0010-1736-f6.pdf]
